# Supplementary material
Source: Springer Nature journal article supplement (https://www.springermedizin.de/resource/supplementary/13058_2011_2847_MOESM1_ESM.pdf/9702690)

**A**

Time to Distant Metastasis  
All subjects, n=265

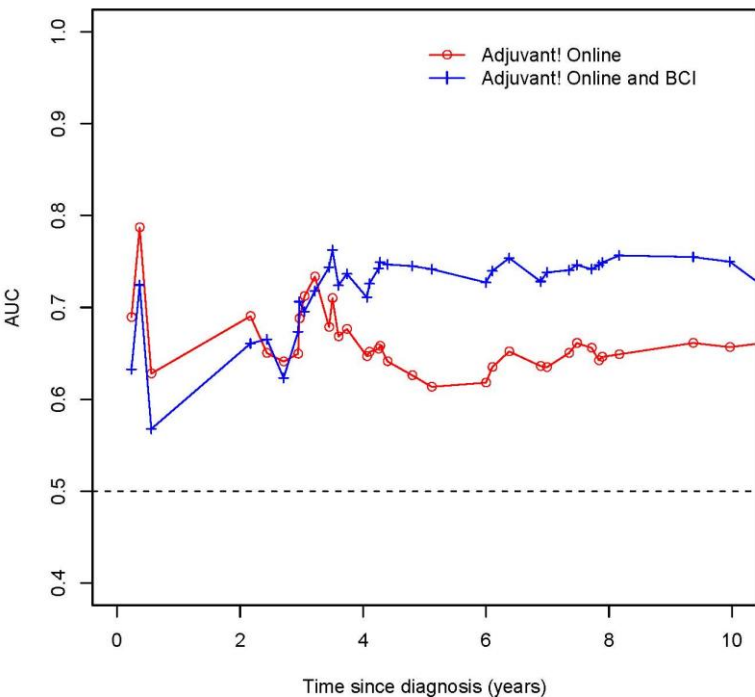**B**

Time to Distant Metastasis  
Tam only subjects, n=180

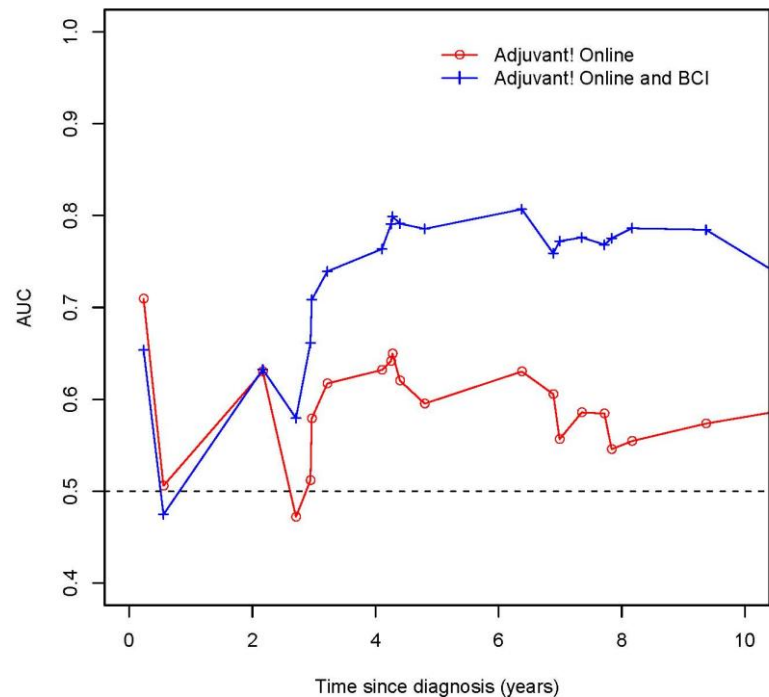

Supplement: MOESM1 [file 9702690]
